# Supplementary figures and images for: Structural insights into the recruitment of viral Type 2 IRES to ribosomal preinitiation complex for protein synthesis
Source: eLife journal article supplement (doi:10.7554/elife.107788), 2025-08-22

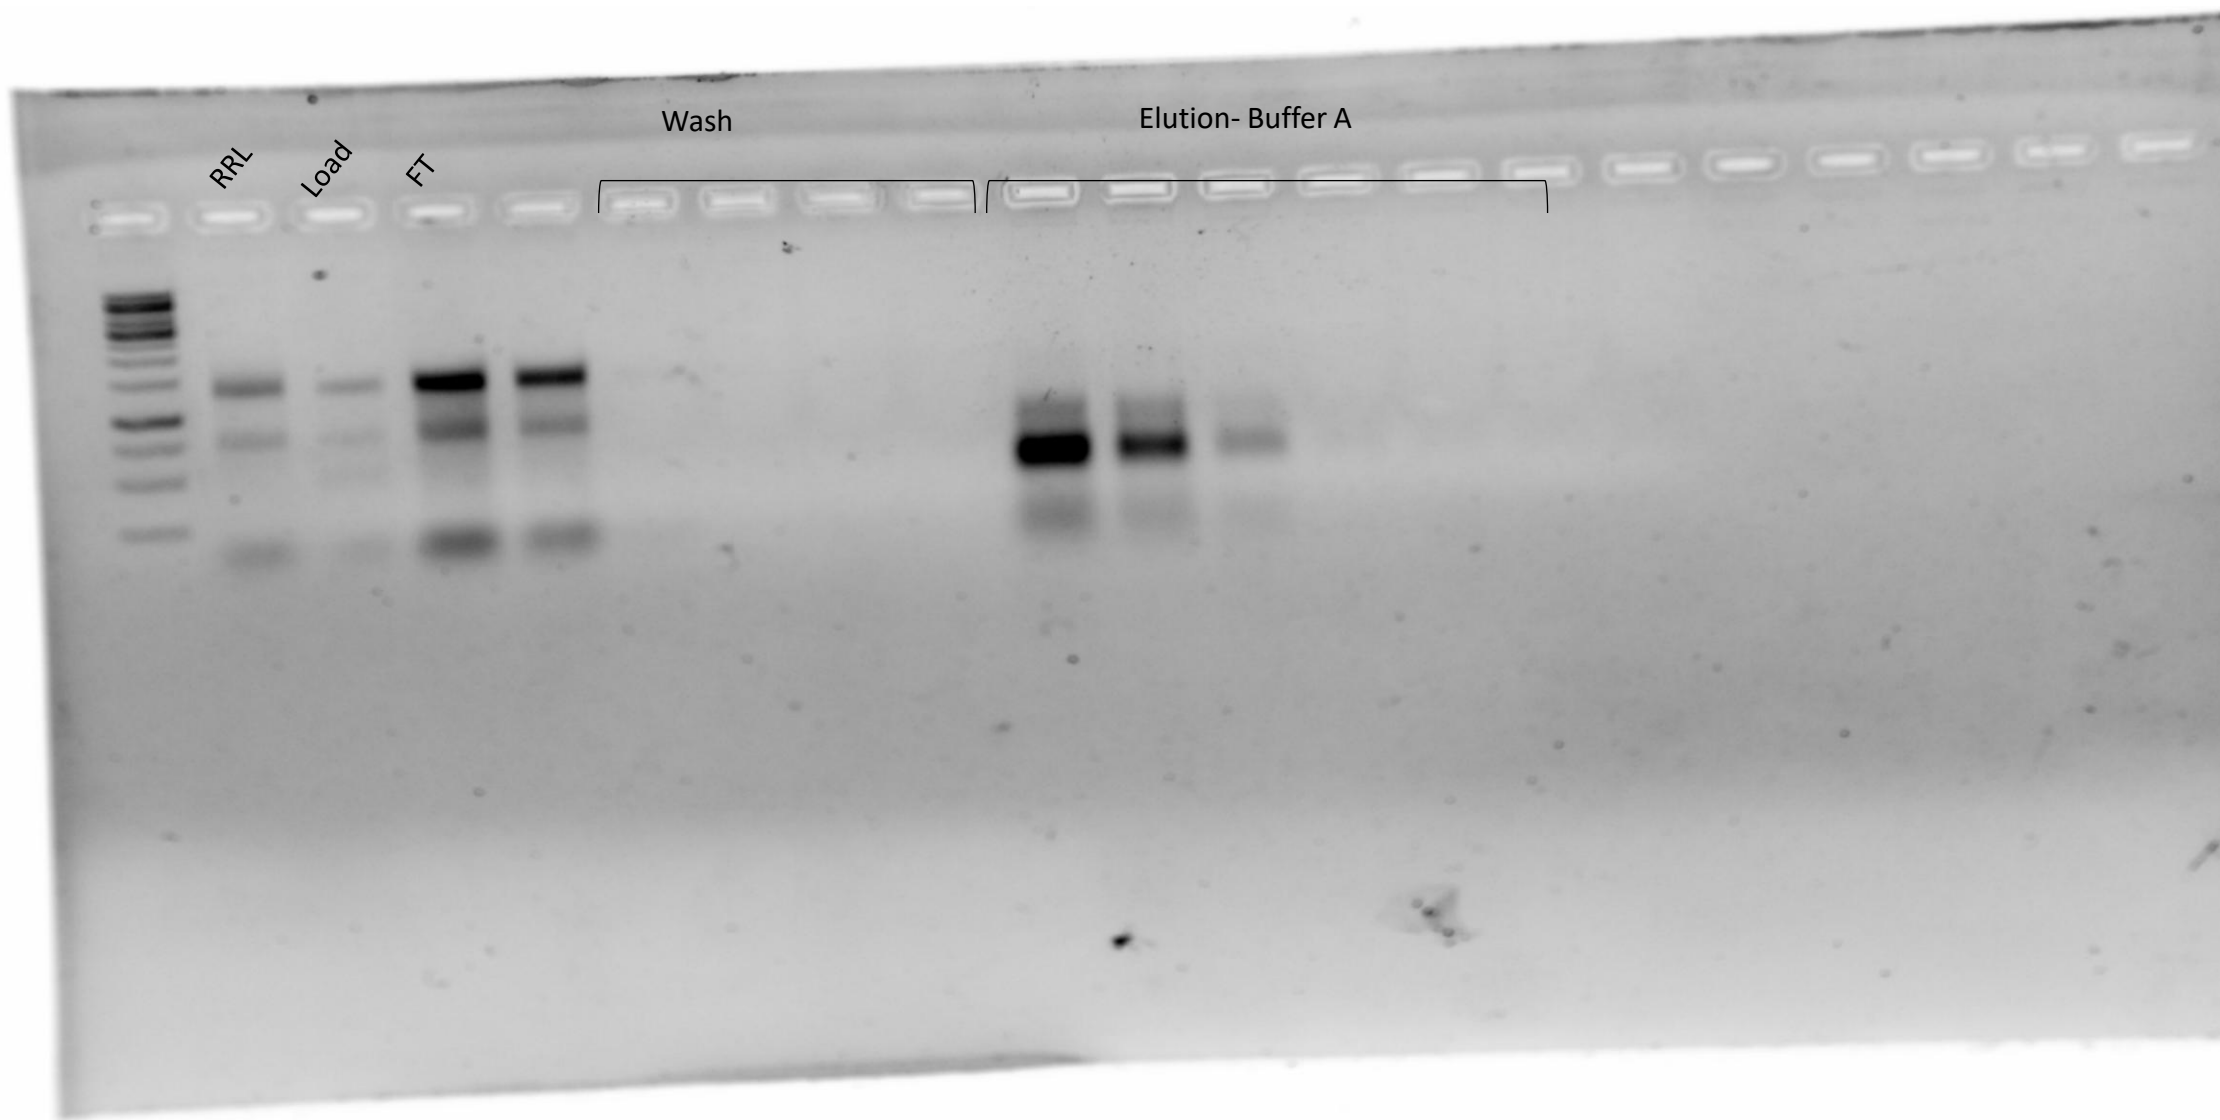

Supplement: fig1-figsupp1-data1 [file Figure 1- Figure supplement 1 (A)- source data 1_labelled.pdf › Source_data_labelled/Figure 1- Figure supplement 1 (A)- source data 1_labelled.pdf]

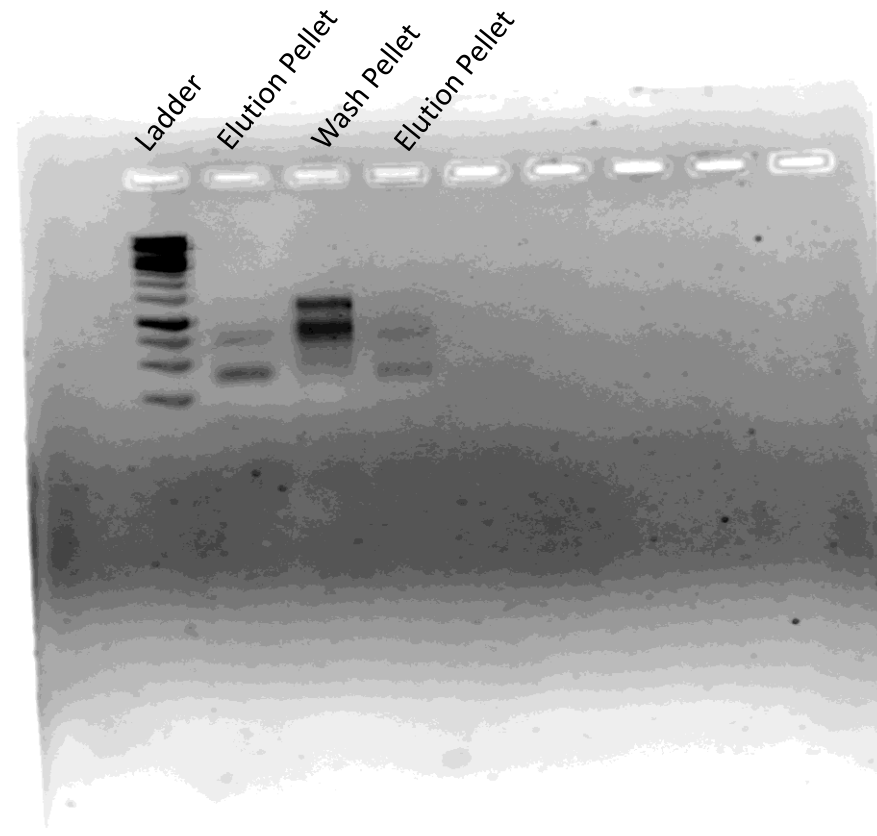

Supplement: fig1-figsupp1-data1 [file Figure 1- Figure supplement 1 (A)- source data 2-labelled.pdf › Source_data_labelled/Figure 1- Figure supplement 1 (A)- source data 2-labelled.pdf]
